# Supplementary material
Source: PubMed Central journal article supplement (PMC6799992)
Supplement: NIHMS1053478-supplement-1.pdf [file NIHMS1053478-supplement-1.pdf]

Cell Reports, Volume 18

## Supplemental Information

### **Metabolic Stress Drives Keratinocyte Defenses against *Staphylococcus aureus* Infection**

**Matthew Wickersham, Sarah Wachtel, Tania Wong Fok Lung, Grace Soong, Rudy Jacquet, Anthony Richardson, Dane Parker, and Alice Prince**

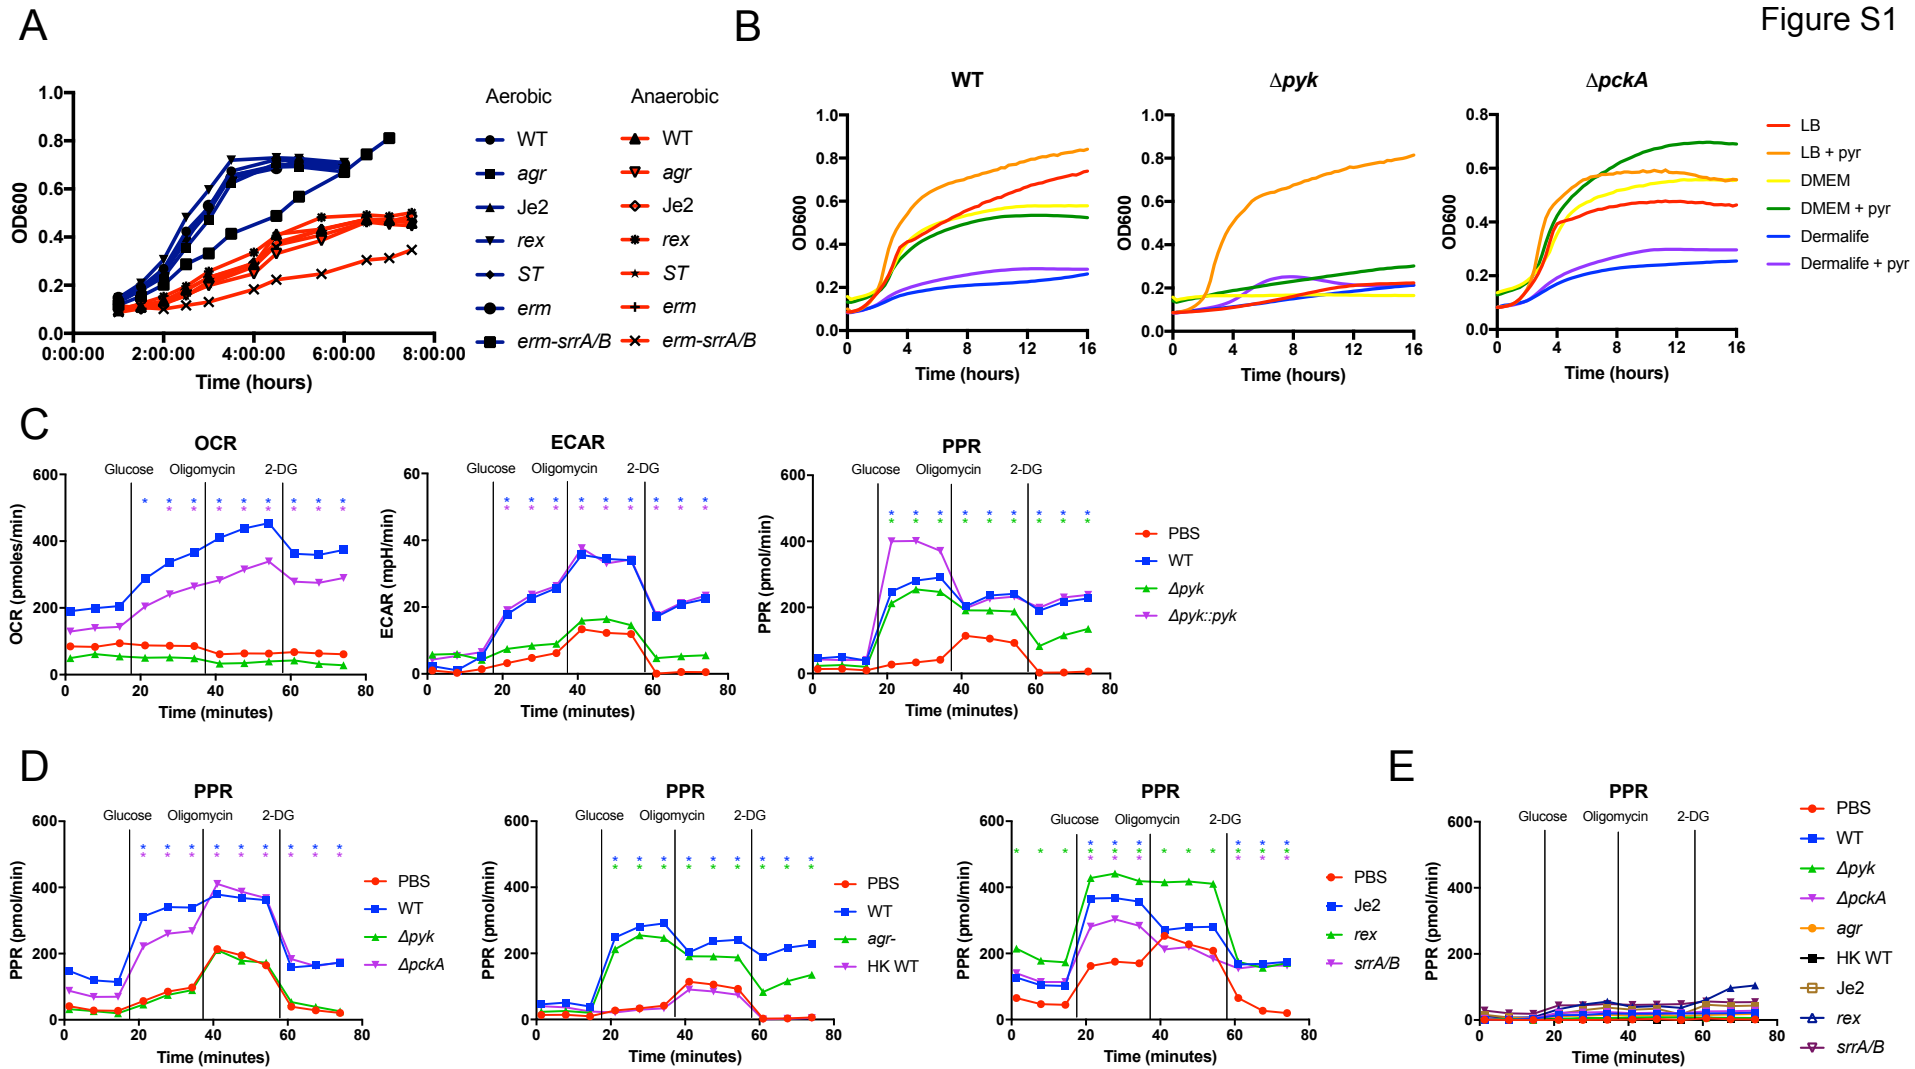

**Figure S1. Related to Figure 1 – Comparative growth of *S. aureus* mutants** – (A) Growth curves of various *S. aureus* strains under aerobic (blue) and anaerobic (red) conditions. (B) Growth curves of metabolic mutants of *S. aureus* in various media used in experiments presented. (C) A Seahorse analyzer was used to monitor the metabolic activity via OCR, ECAR and PPR (proton production rate) of uninfected primary keratinocytes (HEK293) or those exposed to WT,  $\Delta pyk$ , and a complemented  $\Delta pyk$  strain ( $\Delta pyk::\Delta pyk$ ) for 3 hours (MOI 20:1) prior to analysis. (D) PPR measurements were taken using a Seahorse analyzer of uninfected primary keratinocytes (HEK293) or those exposed to various *S. aureus* strains or to heat-killed organisms for 3 hours (MOI 20:1). (E) Proton production rate of bacteria in the absence of keratinocytes was included for comparison. The addition of glucose, oligomycin and 2-DG are indicated as vertical lines. Representative experiments are shown. \* $P < 0.05$  by one-way ANOVA. Seahorse statistical significances are compared to PBS alone.

A

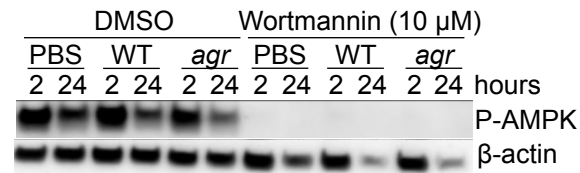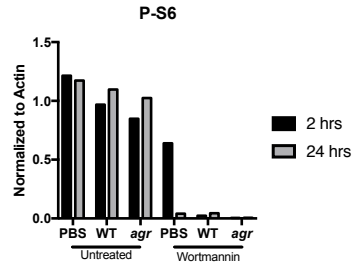

B

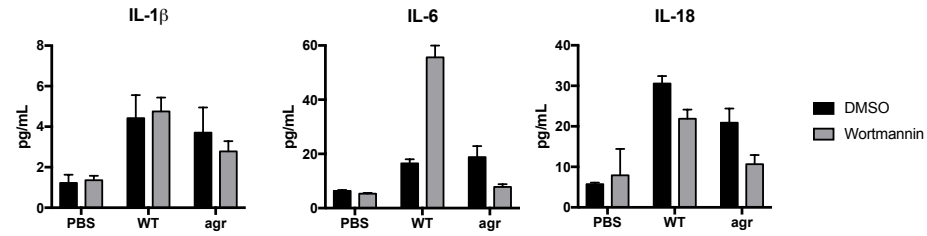

C

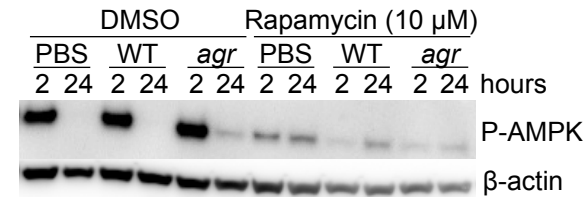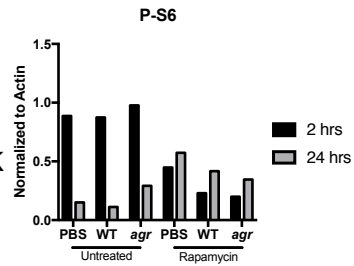

D

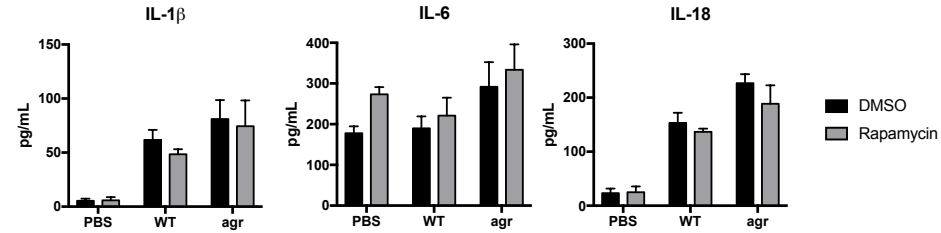

**Figure S2. Related to Figure 3 – Effects of PI3K and mTOR inhibition on proliferation and cytokine production –** (A, B) Immunoblots of phospho-AMPK and cytokines measured by ELISA of HaCaTs exposed to PBS or *S. aureus* for 2 or 24 hours in the presence of wortmannin. Densitometry normalized to actin included for comparison. (C, D) Immunoblots and cytokines measured by ELISA of HEK293 cells exposed to PBS or *S. aureus* for 2 or 24 hours in the presence of rapamycin. Densitometry normalized to actin included for comparison. Representative experiments are shown. For all graphs, each data point is the mean value  $\pm$  SEM (n = 3).
